# Supplementary material
Source: PubMed Central journal article supplement (PMC3720758)
Supplement: NIHMS488750-supplement-1.pdf [file NIHMS488750-supplement-1.pdf]

Guloglu et al. Figure S1

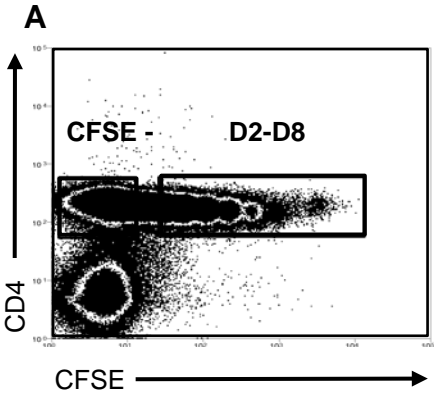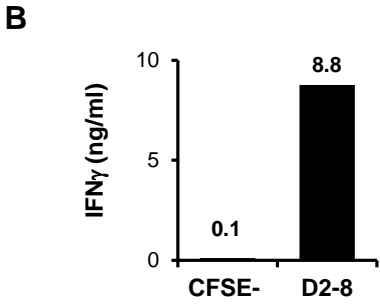

# Guloglu et al. Figure S2

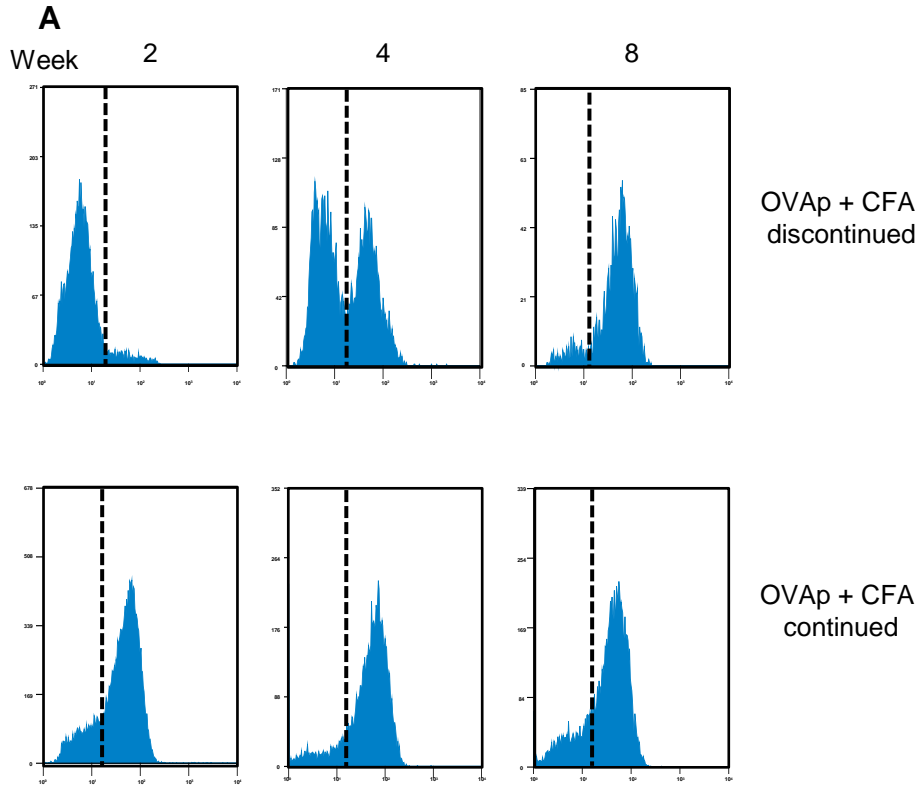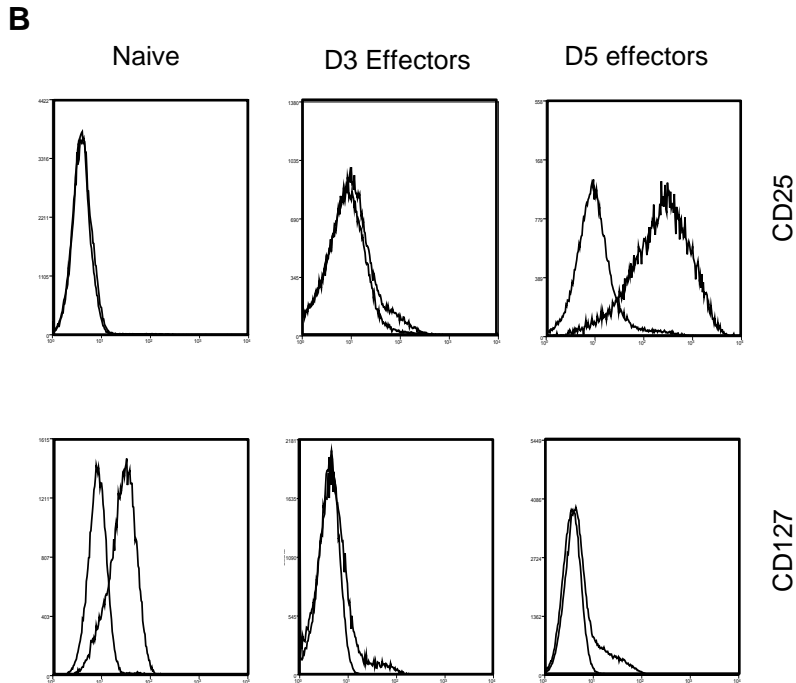

Guloglu et al. Figure S3

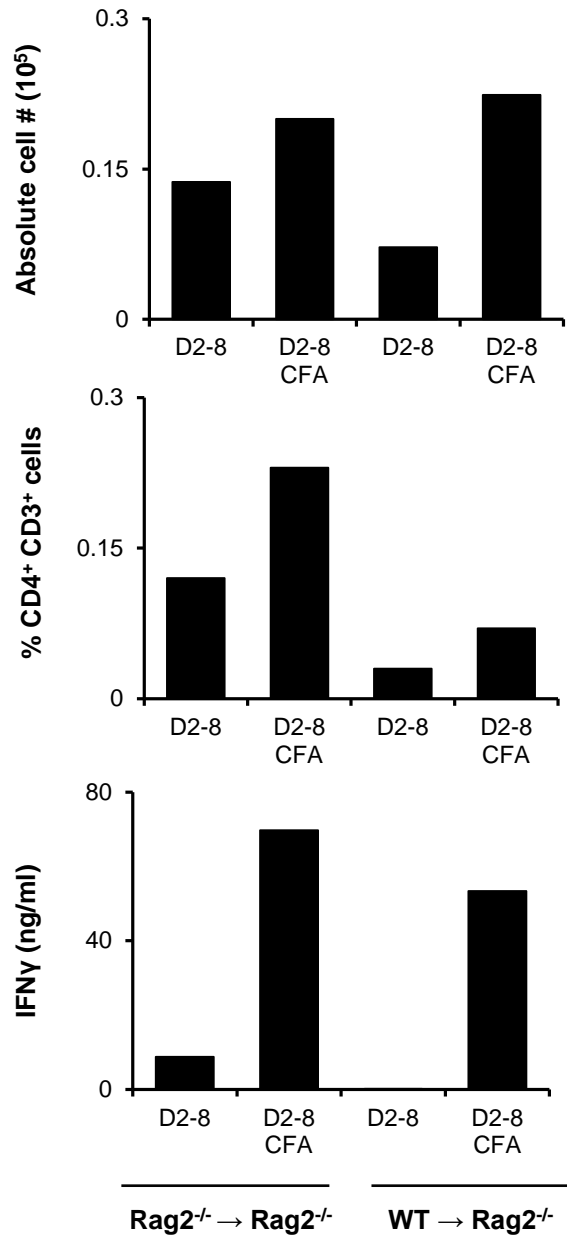

# Guloglu et al. Figure S4

**A**

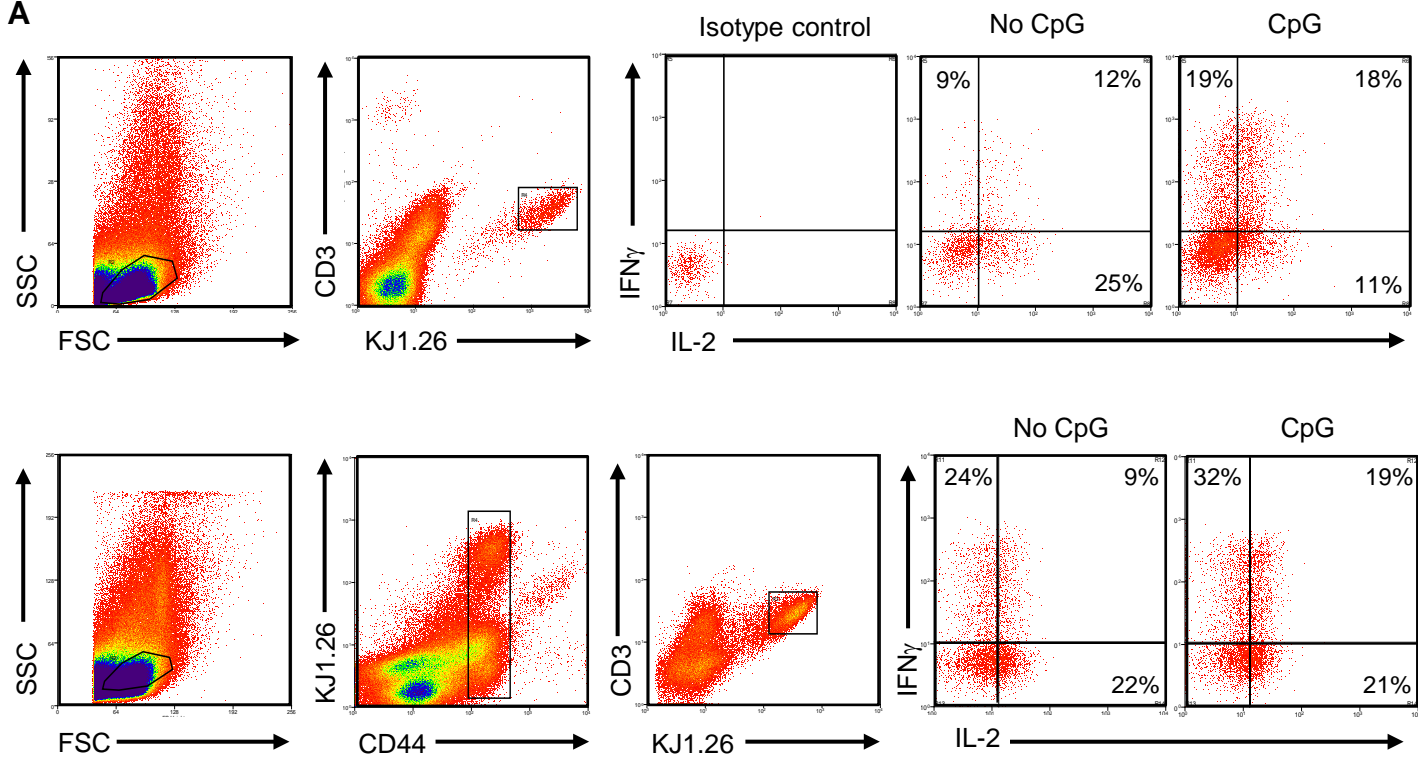

**B**

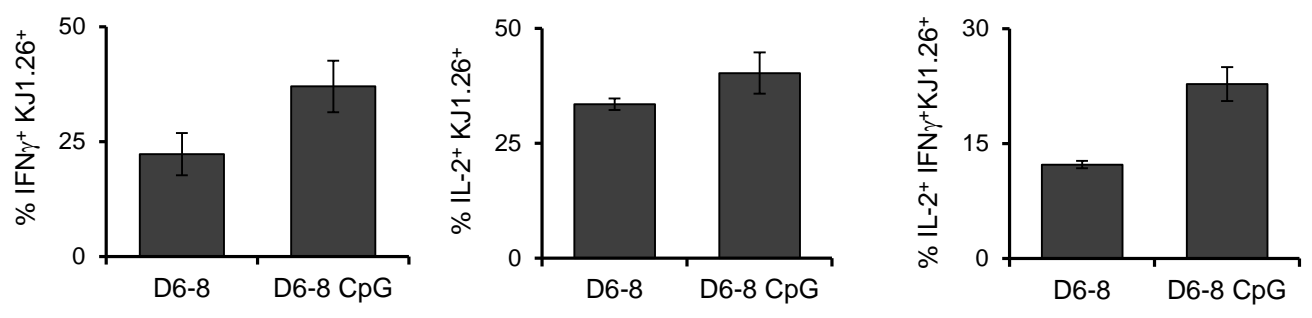

**Figure S1.** Effectors that have undergone more than 8 divisions ( $D > 8$ ) have less potential to transit to memory. CFSE-labeled naïve DO11.10 T cells were transferred into  $Rag2^{-/-}$  mice and the hosts were immunized with OVA<sub>p</sub> in CFA. Eight days later the  $CD4^+CFSE^+$  (D2-8) and  $CD4^+CFSE^-$  ( $CFSE^-$ ) LN effectors were sorted as indicated in (A) and transferred into  $Rag2^{-/-}$  parking hosts. Seven weeks later, the SP cells were harvested and the  $CD4^+KJ1-26^+$  cells were analyzed for  $IFN\gamma$  production (B). The results show that highly activated ( $D > 8$ ) effectors are less likely to transit to memory.

**Figure S2.** Re-expression of IL-7R during transition to memory may be dependent on IL-2 signaling. BALB/c mice recipient of CFSE-labeled naïve T cells were immunized with 125 $\mu$ g OVA/CFA and D2-8 effector T cells were isolated and transferred into  $Rag2^{-/-}$  mice to generate CFA discontinued animals (OVA<sub>p</sub>+CFA discontinued).  $Rag2^{-/-}$  mice, recipient of CFSE-labeled naïve T cells, were immunized with 125 $\mu$ g OVA/CFA and used as CFA continued (OVA+CFA continued) mice. (A) Shows IL-7R expression on  $KJ1.26^+CD4^+$  splenic T cells harvested after 2, 4 and 8 weeks of parking. (B) Shows IL-2R (CD25) and IL-7R (CD127) expression on naïve T cells and on D2-8 effector T cells 3 and 5 days after immunization with OVA<sub>p</sub>+CFA. The cells were gated on  $KJ1.26$  and  $CD4$  and analyzed for CD25 and CD127 expression in comparison with isotype control (dotted lines) by flow cytometry. The results indicate that IL-2R (CD25) expression precedes IL-7R re-expression, perhaps suggesting that signaling through IL-2R is required for IL-7R expression and transition to memory .

**Figure S3.** Effectors primed in  $Rag2^{-/-}$  and wild type (WT) BALB/c hosts show similar responses to antigen-free adjuvant. CFSE-labeled naïve DO11.10 T cells were transferred into  $Rag2^{-/-}$  or WT BALB/c mice and the hosts were immunized with OVA<sub>p</sub> in CFA. Eight days later the  $CFSE^+CD4^+$  LN D2-8 effectors were sorted from each group and transferred into  $Rag2^{-/-}$

hosts recipient of effectors generated in Rag2<sup>-/-</sup> (Rag2<sup>-/-</sup> → Rag2<sup>-/-</sup>) or WT (WT → Rag2<sup>-/-</sup>) mice. Next, each group was divided into 2 subgroups, one of which was given CFA (D2-8/CFA) and the other was not (D2-8). After 7 weeks of parking, the SP cells were harvested and the percentage and absolute number of surviving CD4<sup>+</sup>KJ1-26<sup>+</sup> cells were determined by flow cytometry and their IFN $\gamma$  responses were measured by ELISA.

**Figure S4.** CpG increases the percentage of IL-2-producing IFN $\gamma$ <sup>+</sup>KJ1.26<sup>+</sup> T cells. Late (D6-8) effectors were isolated from BALB/c mice 3 days after immunization with OVAp/CFA and transferred into Rag2<sup>-/-</sup> mice. On day 1, 4, 7 and 10 after cell transfer, the hosts were given CpG TLR9 ligand (50 $\mu$ g/injection) i.p. or left untreated. The splenic cells were harvested after 4 months of parking and analyzed for IL-2 and IFN $\gamma$  production by flow cytometry. (A) Shows the gating strategy for CD3 and KJ1.26 (upper panel) or CD44, KJ1.26 and CD3 (lower panel), followed by analysis of IL-2 and IFN $\gamma$  production by CD3<sup>+</sup>KJ1.26<sup>+</sup> and CD44<sup>+</sup>CD3<sup>+</sup>KJ1.26<sup>+</sup> T cells from the 4-month parking experiments. (B) Shows compiled results for the percentage of KJ1.26<sup>+</sup> T cells producing IFN $\gamma$  (KJ1.26<sup>+</sup>IFN $\gamma$ <sup>+</sup>), IL-2 (KJ1.26<sup>+</sup>IL2<sup>+</sup>) or both IFN $\gamma$  and IL-2 (KJ1.26<sup>+</sup>IFN $\gamma$ <sup>+</sup>IL-2<sup>+</sup>). Each bar represents the mean  $\pm$  SD of four independent experiments. The results indicate that CpG treatment increases the frequency of cytokine-producing memory cells.
